# Supplementary material for: I3− entrapped cationic Zn(ii) coordination polymer: selective detection and dose-dependent photocatalytic degradation of roxithromycin
Source: Royal Society of Chemistry journal article supplement (doi:10.1039/d4ce01006j), 2024-01-01
Supplement: d4ce01006j1.pdf [file d4ce01006j1.pdf]

## Supplementary Information-

### **I<sub>3</sub><sup>-</sup> Entrapped Cationic Zn(II) Coordination Polymer: Selective Detection and Dose-Dependent Photocatalytic Degradation of Roxithromycin**

Preeti Sharma<sup>a</sup>, Musheer Ahmad<sup>b</sup>, Nazrul Haq<sup>c</sup>, Kafeel Ahmad Siddiqui<sup>a</sup>

<sup>a</sup>Department of Chemistry, National Institute of Technology Raipur, G E Road Raipur – 492010, Chhattisgarh, India

<sup>b</sup>Department of Applied Chemistry, Faculty of Engineering and Technology, ZHCET, Aligarh Muslim University, Aligarh, UP (India) – 202002

<sup>c</sup>Department of Pharmaceutics, College of Pharmacy, King Saud University, Riyadh 11451, Saudi Arabia.

E-mail: [nhaq@ksu.edu.sa](mailto:nhaq@ksu.edu.sa)

<sup>a</sup> Corresponding Author: Dr. Kafeel Ahmad Siddiqui <sup>a</sup> e-mail: [kasiddiqui.chy@nitrr.ac.in](mailto:kasiddiqui.chy@nitrr.ac.in)

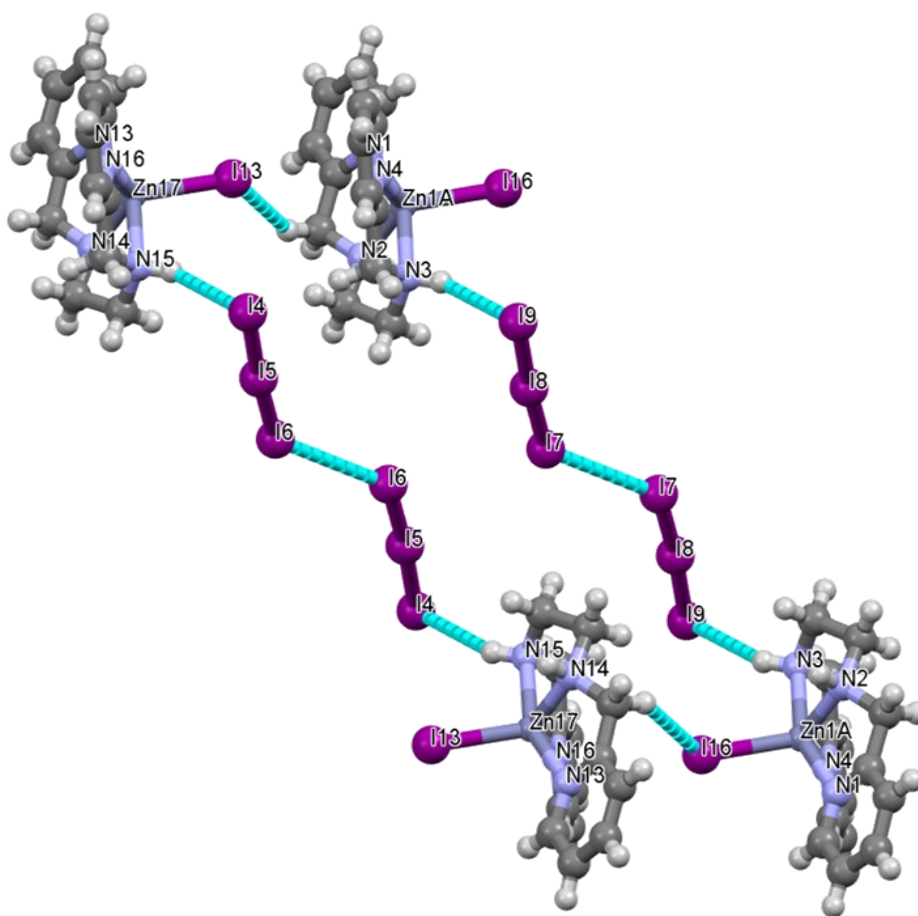

**Fig. S1.** One-dimensional polymeric non-covalent interaction of Zinc-CP along with crystallography b-axis

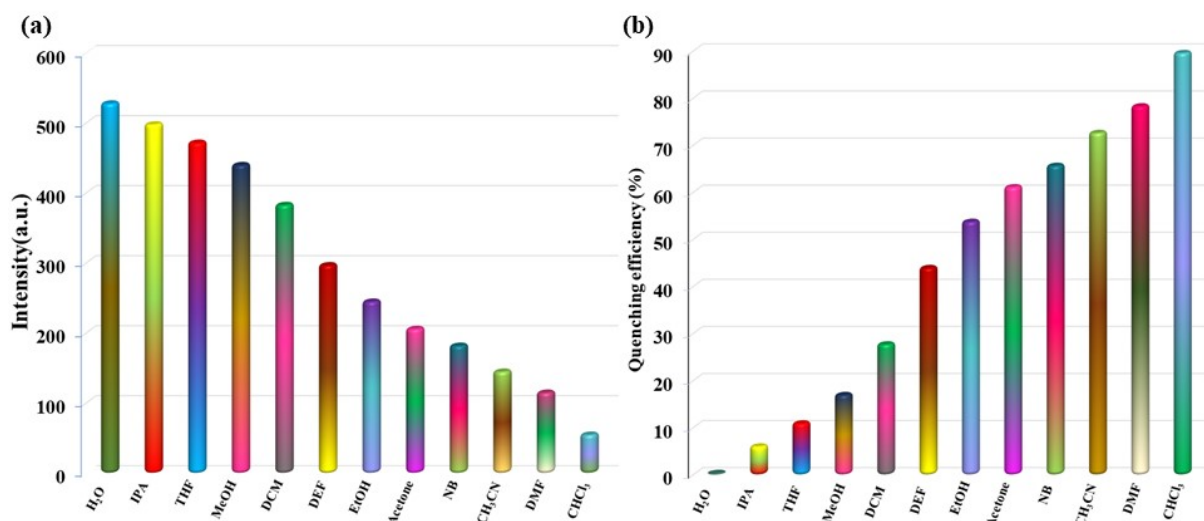

**Fig. S2.** (a) The levels of fluorescence intensity exhibited by **Zinc-CP** in the presence of different organic solvents; and (b) The relative quenching efficiencies of **Zinc-CP** dispersed in aqueous solutions containing specific solvents.

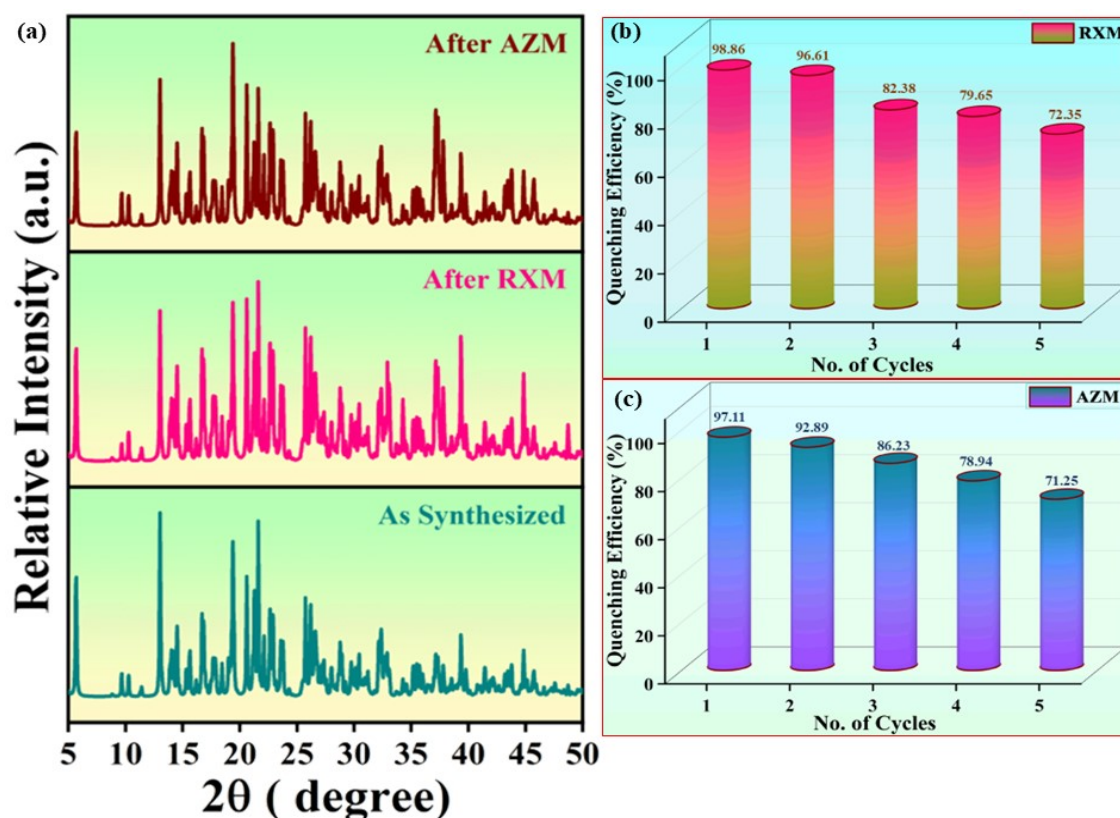

**Fig. S3.** (a) PXR D pattern of **Zinc-CP** after luminescence detection of antibiotics RXM and AZM (b) Quenching efficiency (%) of **Zinc-CP** over the course of five cycles and (c) Quenching efficiency (%) of **Zinc-CP** over the course of five cycles.

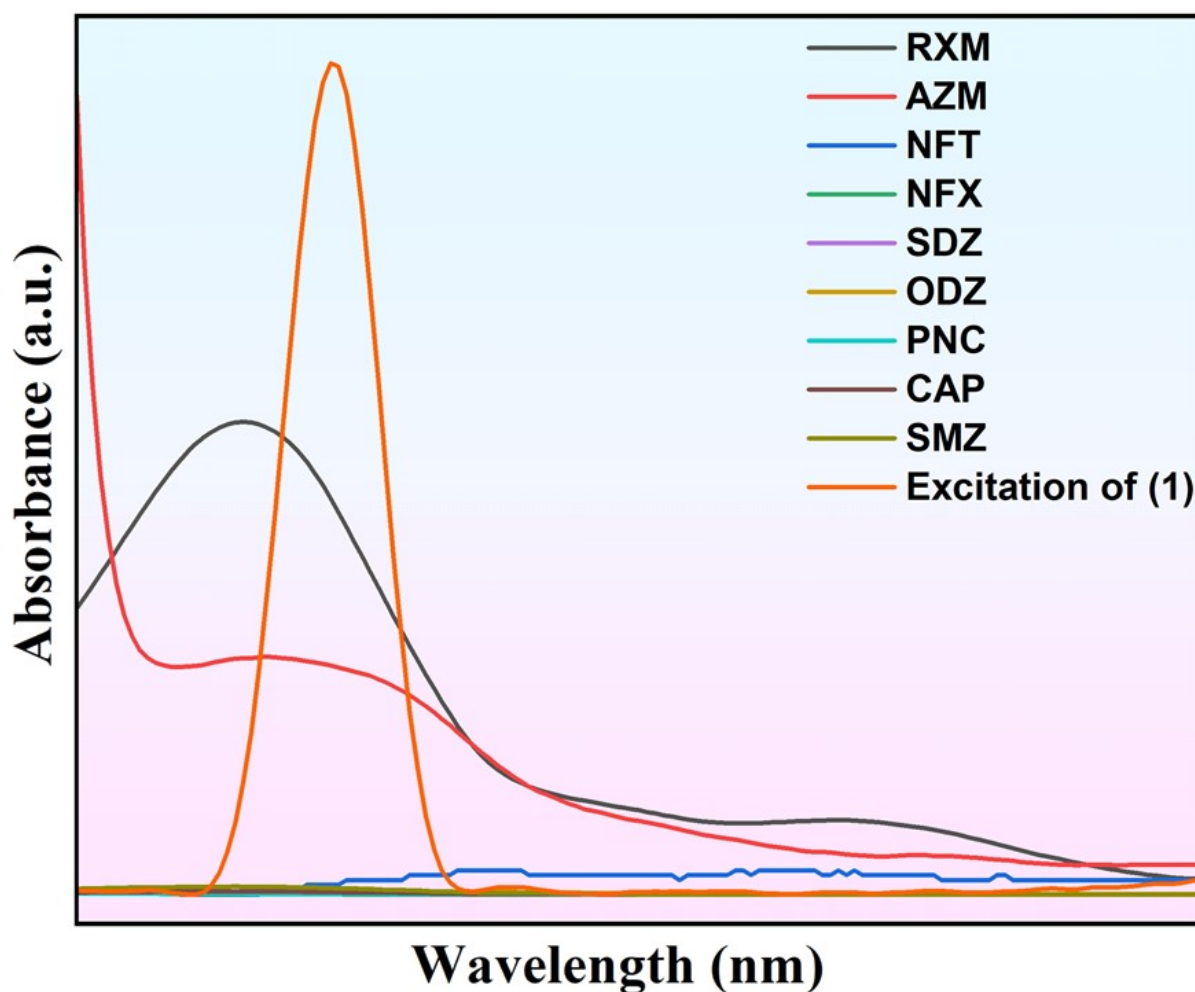

Fig. S4. Spectral overlap between the UV-Vis absorption spectra of Antibiotics (RXM and AZM) with the excitation spectra of **Zinc-CP**.

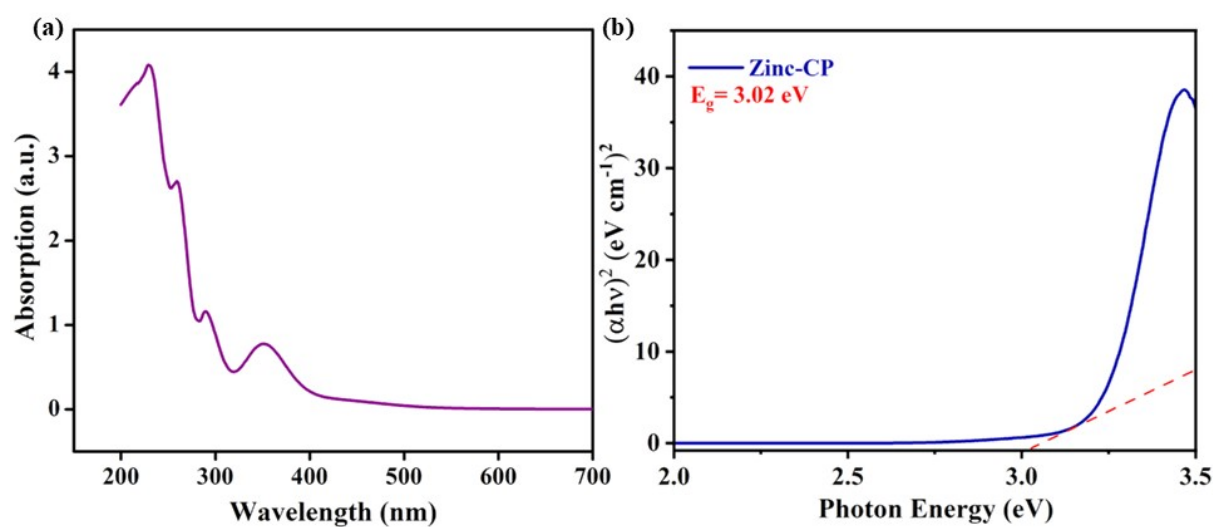

Fig. S5. (a) UV-Visible absorption spectra of **Zinc-CP** (b) Band gap analysis of **Zinc-CP** using Tauc Plot  $(\alpha h\nu)^2 \text{ (eV cm}^{-1}\text{)}^2$  Vs Energy (eV).

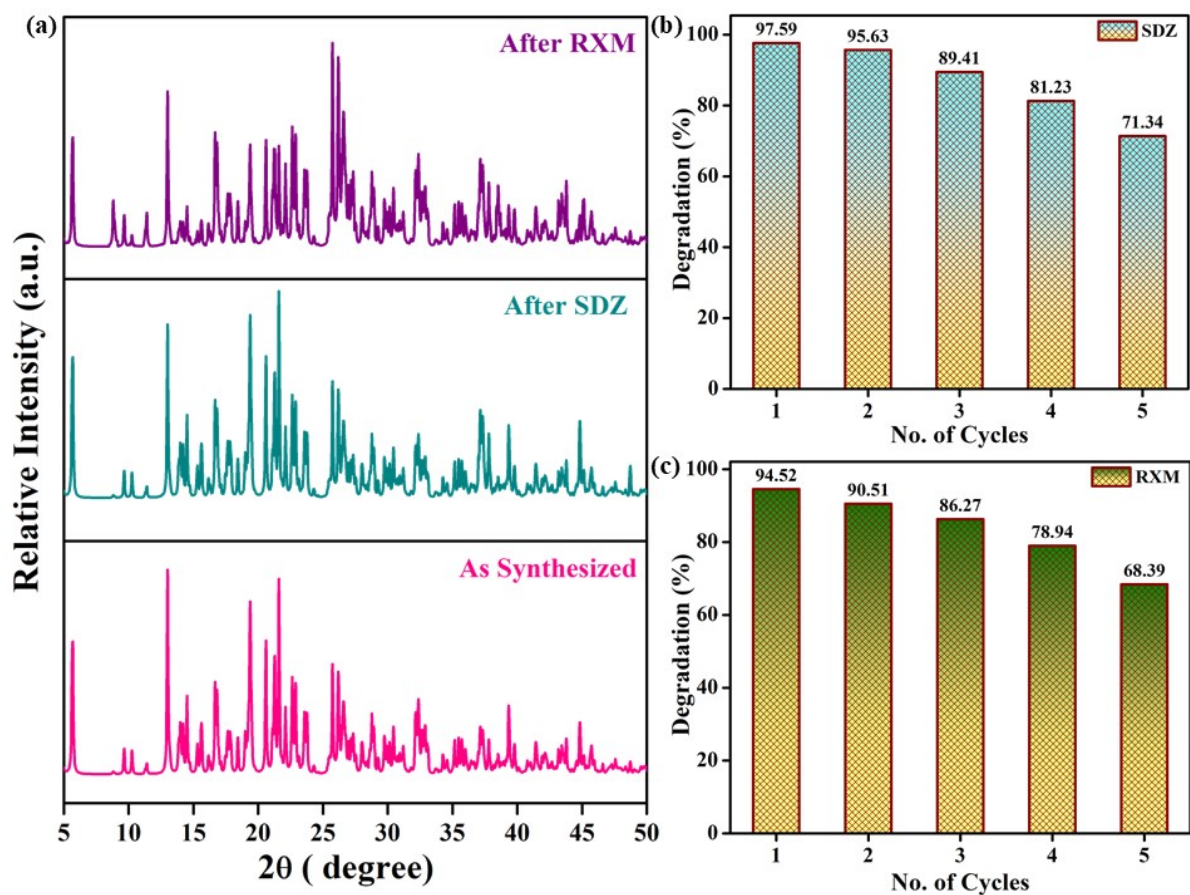

**Fig. S6.** (a) PXRD pattern of **Zinc-CP** and after photocatalytic degradation of antibiotics SDZ and RXM (b) degradation efficiency of **Zinc-CP** over the course of five cycles and (c) degradation efficiency of **Zinc-CP** over the course of five cycles.



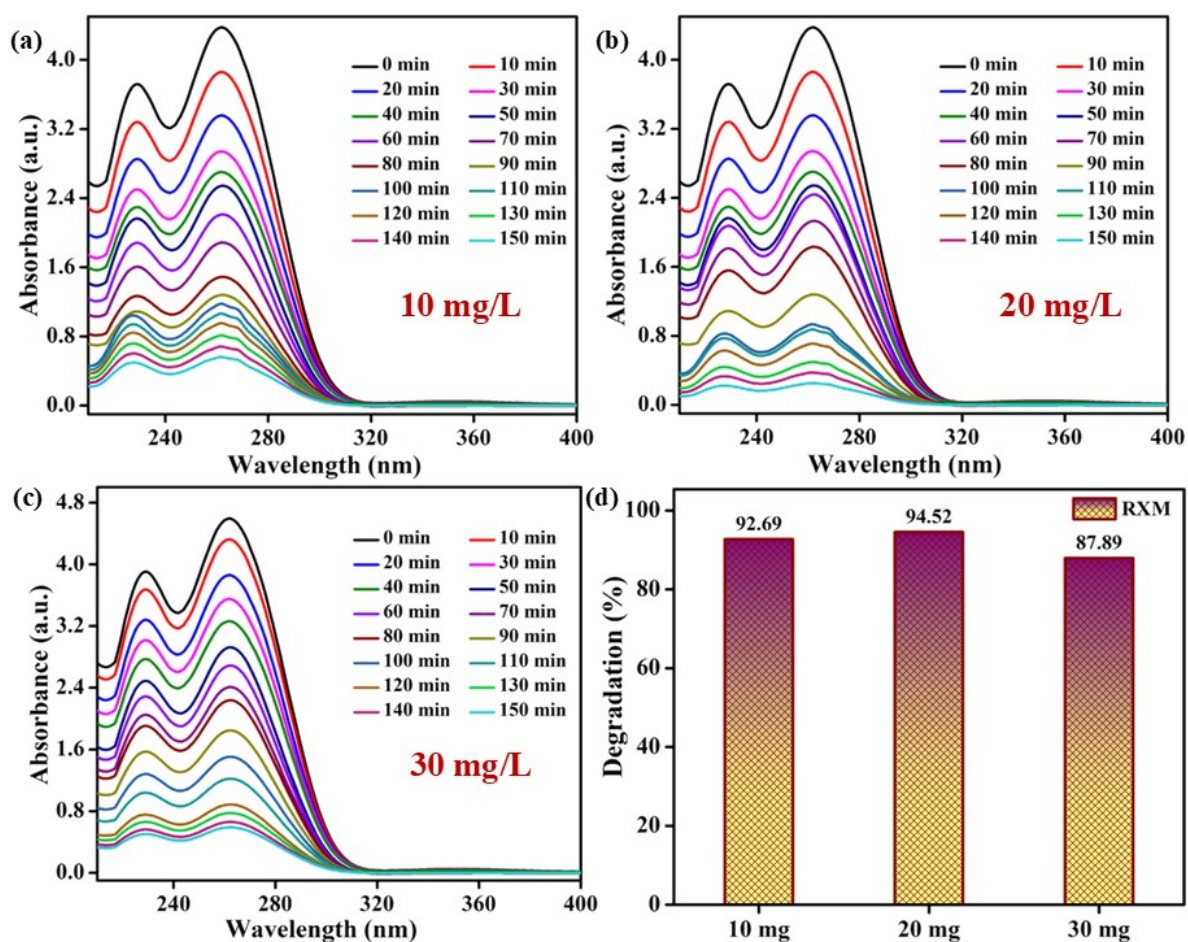

**Fig. S7.** Periodic UV-Vis spectra for RXM in presence of (a) 10 mg photocatalyst **Zinc-CP**; (b) 20 mg photocatalyst **Zinc-CP**; (c) 30 mg photocatalyst **Zinc-CP**; (d) bar plot indicating effect of variable photocatalyst **Zinc-CP** on percentage photodegradation of RXM.

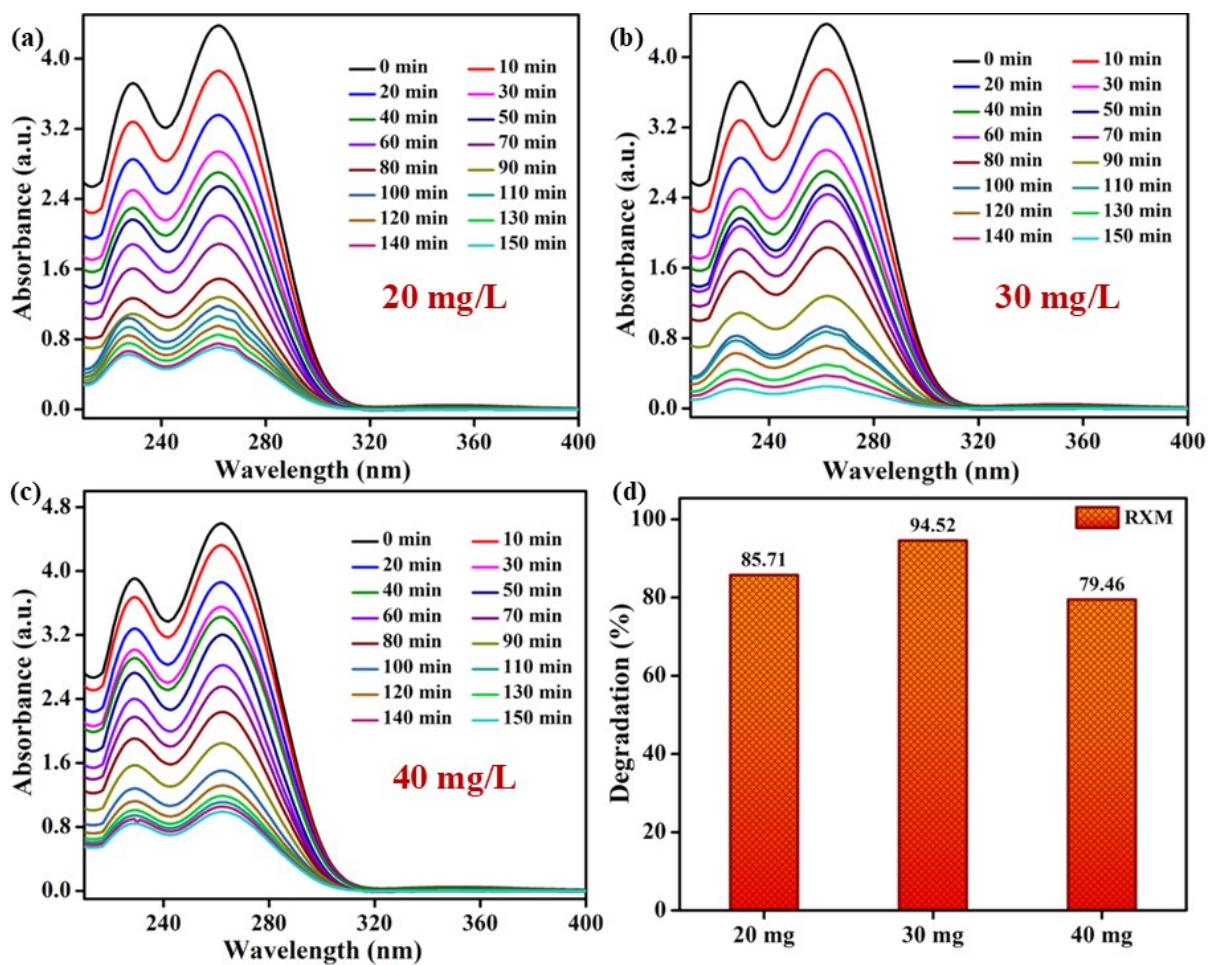

**Fig. S8.** Periodic UV-Vis spectra for **RXM** in presence of (a) 20 mg/L of **RXM**; (b) 30 mg/L of **RXM**; (c) 40 mg/L of **RXM**; (d) bar plot indicating effect of variable **RXM** concentration on percentage photodegradation of **RXM** (photocatalyst dosages was fixed at 20 mg/L).

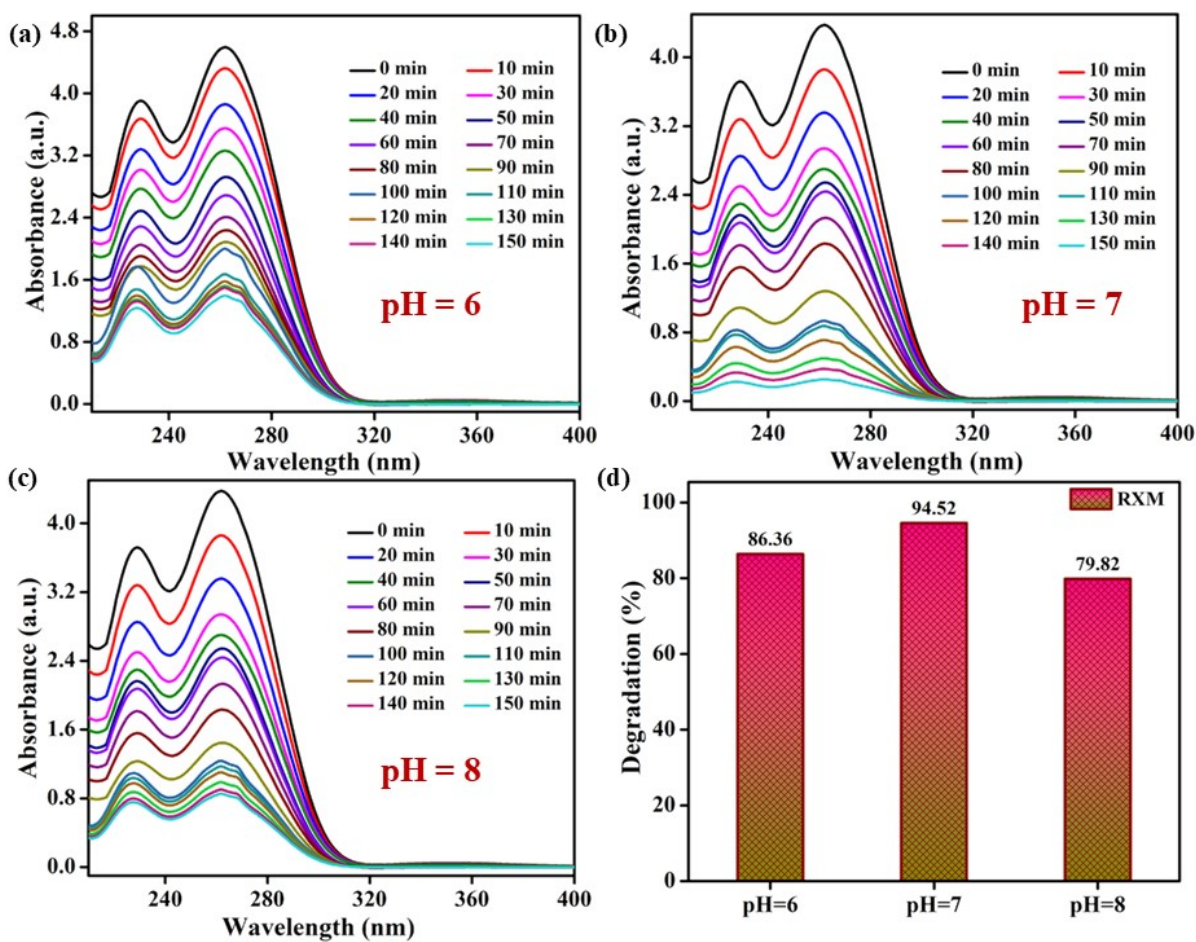

**Fig. S9.** Periodic UV-Vis spectra for **RXM** in presence of (a) pH = 6; (b) pH = 7; (c) pH = 8; (d) bar plot indicating effect of variable **pH** on percentage photodegradation of **RXM** with **Zinc-CP**.



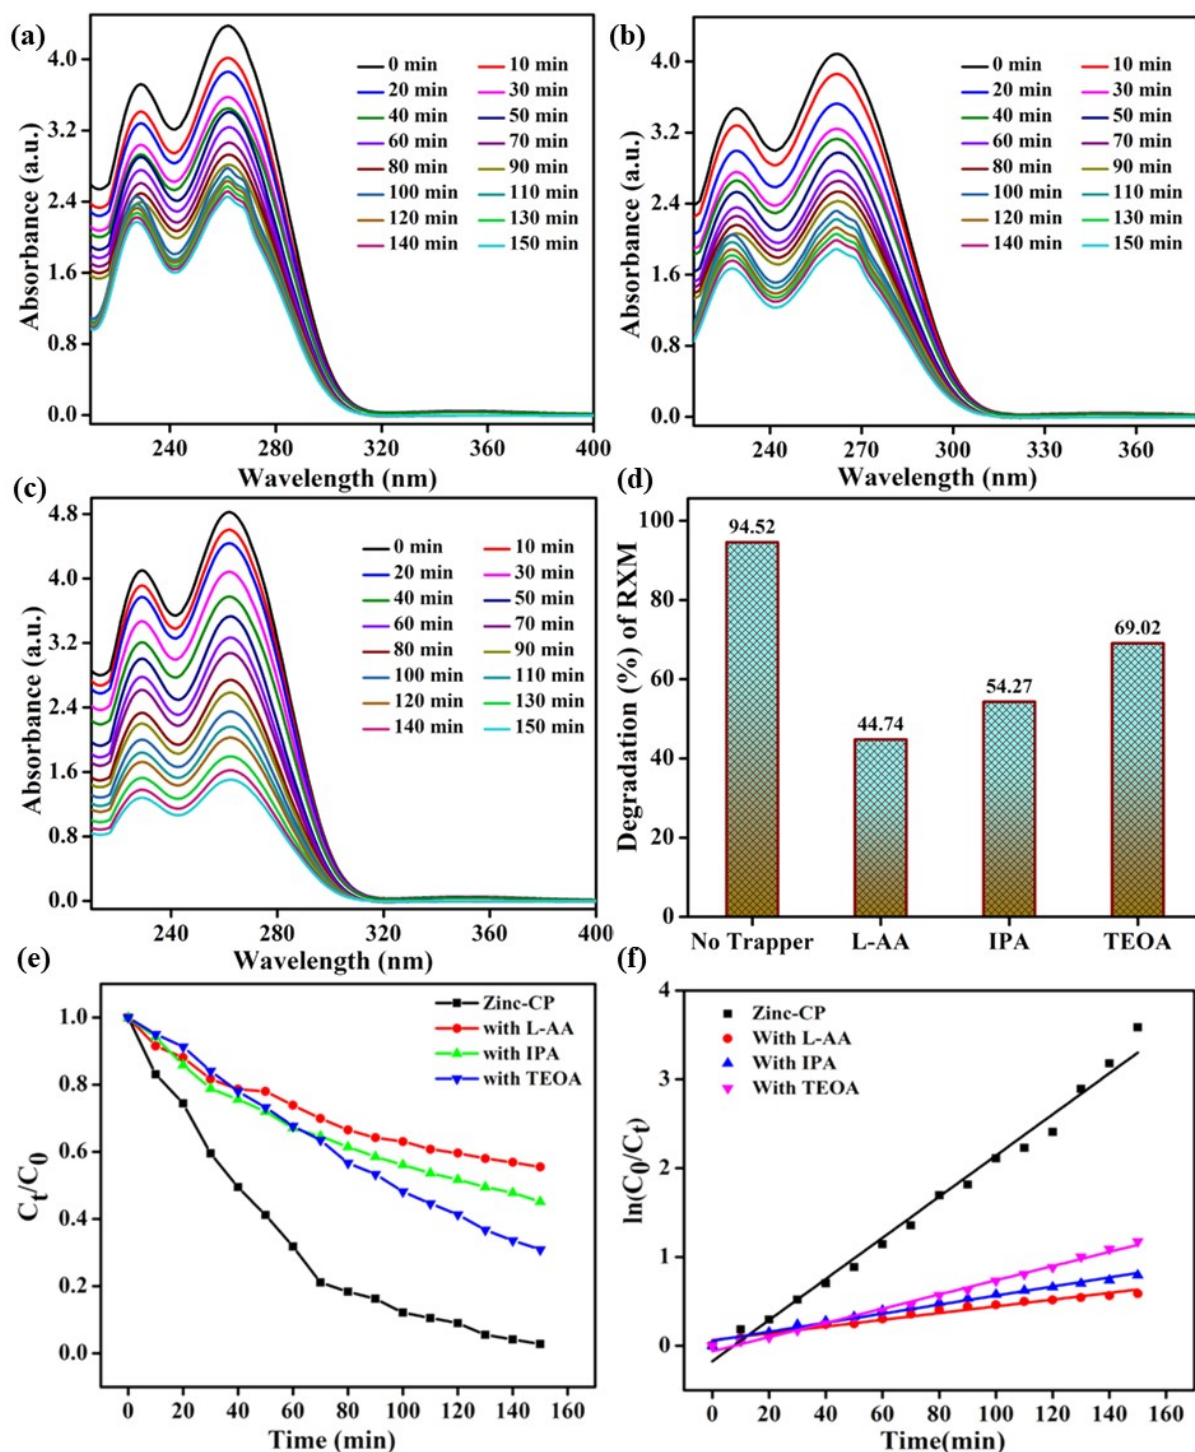

**Fig. S10.** The UV-Vis spectrum for RXM was analyzed in presence of the photocatalyst **Zinc-CP** and different radical trapping agents: (a) L-AA; (b) IPA; (c) TEOA; (d) the effect of trapping agents on the percentage photodegradation of RXM. (e) plot created to illustrate  $C_t/C_0$  vs irradiation time for the photodegradation of RXM with **Zinc-CP** and various trapping agents. (f) a pseudo first-order kinetics plot ( $\ln(C_0/C_t)$  Vs Time) was generated for



the degradation of RXM with **Zinc-CP** and different trapping agents. (The photocatalyst dosage was set at 20 mg/L and the RXM concentration was set at 30 mg/L).

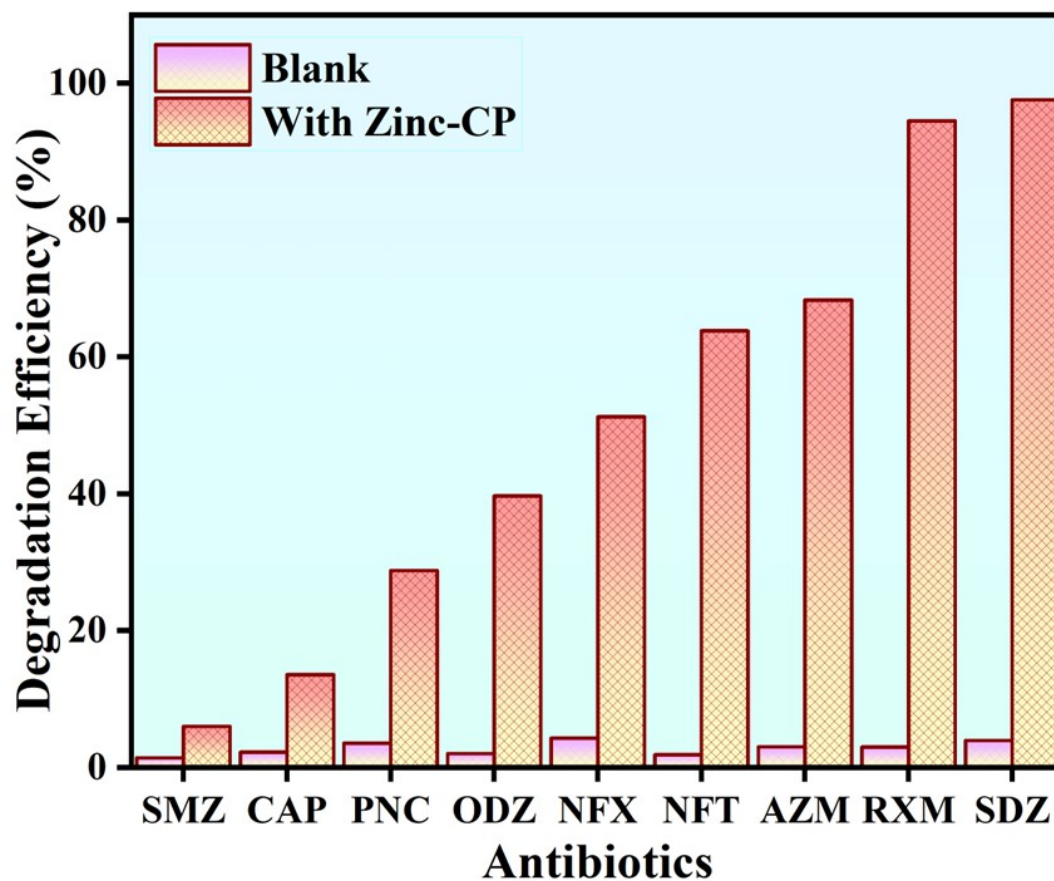

**Fig. S11.** The degradation efficiency percentage of antibiotics with and without Zinc-CP.

**Table S1** Bond Lengths for **Zinc-CP**.

| Atom | Atom | Length/Å   | Atom | Atom | Length/Å   |
|------|------|------------|------|------|------------|
| I13  | Zn17 | 2.5825(19) | I15  | Zn19 | 2.587(2)   |
| Zn17 | N13  | 2.173(11)  | Zn19 | N5   | 2.123(11)  |
| Zn17 | N14  | 2.114(13)  | Zn19 | N6   | 2.103(12)  |
| Zn17 | N15  | 2.206(12)  | Zn19 | N7   | 2.209(11)  |
| Zn17 | N16  | 2.082(13)  | Zn19 | N8   | 2.070(10)  |
| I14  | Zn18 | 2.582(2)   | I16  | Zn1A | 2.5808(19) |
| Zn18 | N9   | 2.093(13)  | Zn1A | N1   | 2.158(14)  |

|             |            |           |  |             |           |           |
|-------------|------------|-----------|--|-------------|-----------|-----------|
| <b>Zn18</b> | <b>N10</b> | 2.166(12) |  | <b>Zn1A</b> | <b>N2</b> | 2.115(11) |
| <b>Zn18</b> | <b>N11</b> | 2.110(12) |  | <b>Zn1A</b> | <b>N3</b> | 2.186(13) |
| <b>Zn18</b> | <b>N12</b> | 2.145(13) |  | <b>Zn1A</b> | <b>N4</b> | 2.067(12) |

**Table S2** Bond Angles for **Zinc-CP**.

| <b>Atom</b> | <b>Atom</b> | <b>Atom</b> | <b>Angle/°</b> | <b>Atom</b> | <b>Atom</b> | <b>Atom</b> | <b>Angle/°</b> |
|-------------|-------------|-------------|----------------|-------------|-------------|-------------|----------------|
| <b>N13</b>  | <b>Zn17</b> | <b>I13</b>  | 102.8(3)       | <b>N5</b>   | <b>Zn19</b> | <b>I15</b>  | 102.6(3)       |
| <b>N14</b>  | <b>Zn17</b> | <b>I13</b>  | 119.3(4)       | <b>N6</b>   | <b>Zn19</b> | <b>I15</b>  | 117.9(3)       |
| <b>N14</b>  | <b>Zn17</b> | <b>N13</b>  | 78.8(5)        | <b>N6</b>   | <b>Zn19</b> | <b>N5</b>   | 79.2(5)        |
| <b>N15</b>  | <b>Zn17</b> | <b>I13</b>  | 99.7(3)        | <b>N7</b>   | <b>Zn19</b> | <b>I15</b>  | 100.4(3)       |
| <b>N15</b>  | <b>Zn17</b> | <b>N13</b>  | 155.2(5)       | <b>N7</b>   | <b>Zn19</b> | <b>N5</b>   | 154.8(5)       |
| <b>N15</b>  | <b>Zn17</b> | <b>N14</b>  | 81.1(4)        | <b>N7</b>   | <b>Zn19</b> | <b>N6</b>   | 80.9(5)        |
| <b>N16</b>  | <b>Zn17</b> | <b>I13</b>  | 112.6(3)       | <b>N8</b>   | <b>Zn19</b> | <b>I15</b>  | 112.9(3)       |
| <b>N16</b>  | <b>Zn17</b> | <b>N13</b>  | 102.2(5)       | <b>N8</b>   | <b>Zn19</b> | <b>N5</b>   | 101.8(5)       |
| <b>N16</b>  | <b>Zn17</b> | <b>N14</b>  | 126.5(5)       | <b>N8</b>   | <b>Zn19</b> | <b>N6</b>   | 127.6(5)       |
| <b>N16</b>  | <b>Zn17</b> | <b>N15</b>  | 78.5(5)        | <b>N8</b>   | <b>Zn19</b> | <b>N7</b>   | 78.5(5)        |
| <b>C52</b>  | <b>N13</b>  | <b>Zn17</b> | 113.8(10)      | <b>C24</b>  | <b>N5</b>   | <b>Zn19</b> | 114.5(10)      |
| <b>C56</b>  | <b>N13</b>  | <b>Zn17</b> | 125.4(11)      | <b>C28</b>  | <b>N5</b>   | <b>Zn19</b> | 128.0(10)      |
| <b>C50</b>  | <b>N14</b>  | <b>Zn17</b> | 111.7(10)      | <b>C22</b>  | <b>N6</b>   | <b>Zn19</b> | 110.1(9)       |
| <b>C51</b>  | <b>N14</b>  | <b>Zn17</b> | 109.1(9)       | <b>C23</b>  | <b>N6</b>   | <b>Zn19</b> | 110.7(9)       |
| <b>C48</b>  | <b>N15</b>  | <b>Zn17</b> | 108.0(10)      | <b>C20</b>  | <b>N7</b>   | <b>Zn19</b> | 107.7(10)      |
| <b>C49</b>  | <b>N15</b>  | <b>Zn17</b> | 106.3(9)       | <b>C21</b>  | <b>N7</b>   | <b>Zn19</b> | 107.6(9)       |
| <b>C43</b>  | <b>N16</b>  | <b>Zn17</b> | 124.6(11)      | <b>C15</b>  | <b>N8</b>   | <b>Zn19</b> | 124.4(10)      |
| <b>C47</b>  | <b>N16</b>  | <b>Zn17</b> | 117.2(12)      | <b>C19</b>  | <b>N8</b>   | <b>Zn19</b> | 116.4(12)      |
| <b>N9</b>   | <b>Zn18</b> | <b>I14</b>  | 113.1(3)       | <b>N1</b>   | <b>Zn1A</b> | <b>I16</b>  | 102.0(3)       |
| <b>N10</b>  | <b>Zn18</b> | <b>I14</b>  | 100.0(4)       | <b>N2</b>   | <b>Zn1A</b> | <b>I16</b>  | 119.8(3)       |
| <b>N10</b>  | <b>Zn18</b> | <b>N9</b>   | 81.2(5)        | <b>N2</b>   | <b>Zn1A</b> | <b>N1</b>   | 78.9(5)        |
| <b>N11</b>  | <b>Zn18</b> | <b>I14</b>  | 118.5(4)       | <b>N3</b>   | <b>Zn1A</b> | <b>I16</b>  | 100.4(3)       |

|     |      |      |           |  |     |      |      |           |
|-----|------|------|-----------|--|-----|------|------|-----------|
| N11 | Zn18 | N9   | 127.3(5)  |  | N3  | Zn1A | N1   | 155.0(5)  |
| N11 | Zn18 | N10  | 80.0(5)   |  | N3  | Zn1A | N2   | 80.5(5)   |
| N12 | Zn18 | I14  | 102.7(4)  |  | N4  | Zn1A | I16  | 112.6(3)  |
| N12 | Zn18 | N9   | 101.2(5)  |  | N4  | Zn1A | N1   | 101.5(5)  |
| N12 | Zn18 | N10  | 153.9(5)  |  | N4  | Zn1A | N2   | 126.4(4)  |
| N12 | Zn18 | N11  | 78.0(5)   |  | N4  | Zn1A | N3   | 79.9(5)   |
| C38 | N9   | Zn18 | 114.7(10) |  | C1  | N1   | Zn1A | 127.1(13) |
| C42 | N9   | Zn18 | 127.7(12) |  | C5  | N1   | Zn1A | 113.2(11) |
| C36 | N10  | Zn18 | 110.0(9)  |  | C7  | N2   | Zn1A | 109.5(9)  |
| C37 | N10  | Zn18 | 107.6(9)  |  | C8  | N3   | Zn1A | 108.6(10) |
| C34 | N11  | Zn18 | 111.9(9)  |  | C9  | N3   | Zn1A | 107.8(9)  |
| C35 | N11  | Zn18 | 111.5(9)  |  | C10 | N4   | Zn1A | 117.3(11) |
| C29 | N12  | Zn18 | 126.5(13) |  | C14 | N4   | Zn1A | 125.2(12) |
| C33 | N12  | Zn18 | 116.1(11) |  |     |      |      |           |

**Table S3:** Influence of SDZ and RXM Concentration, Zinc-CP Dosage, and pH Variations on the Photocatalytic Degradation Process.

| S.No.     | Effect of Reaction Parameters       | Degradation (%) |       |
|-----------|-------------------------------------|-----------------|-------|
|           |                                     | SDZ             | RXM   |
| <b>1.</b> | <b>Effect of Dosages of Zinc-CP</b> |                 |       |
| a.        | 10 mg/L                             | 91.69           | 92.69 |
| b.        | 20 mg/L                             | 97.59           | 94.52 |

|           |                                                               |       |       |
|-----------|---------------------------------------------------------------|-------|-------|
| c.        | 30 mg/L                                                       | 83.59 | 87.89 |
| <b>2.</b> | <b>Effect of Concentration of Antibiotics (SDZ &amp; RXM)</b> |       |       |
| a.        | 20 mg/L                                                       | 88.58 | 85.71 |
| b.        | 30 mg/L                                                       | 97.59 | 94.52 |
| c.        | 40 mg/L                                                       | 83.59 | 79.46 |
| <b>3.</b> | <b>Effect of pH level</b>                                     |       |       |
| a.        | pH = 6                                                        | 87.93 | 86.36 |
| b.        | pH = 7                                                        | 97.59 | 94.52 |
| c.        | pH = 8                                                        | 76.17 | 79.82 |
